# Supplementary material for: Genomic modelling of the ESR1 Y537S mutation for evaluating function and new therapeutic approaches for metastatic breast cancer
Source: PubMed Central journal article supplement (PMC5245767; doi:10.1038/onc.2016.382), 2016-10-17

**A**

| CRISPR Number               | Chromosomal Location     | Strand | Sequence                |
|-----------------------------|--------------------------|--------|-------------------------|
| human_exon_crispr_v1_058819 | chr6:152419954-152419976 | -      | GGCTAGTGGGCGCATGTAGGCGG |
| human_exon_crispr_v1_058820 | chr6:152419967-152419989 | -      | GATGCCCTCCACGGCTAGTGGG  |
| human_exon_crispr_v1_058821 | chr6:152419968-152419990 | -      | GGATGCCCTCCACGGCTAGTGG  |
| human_exon_crispr_v1_058822 | chr6:152420050-152420072 | +      | GCAAAAGTATTACATCACGGGGG |

**B**

HCT116

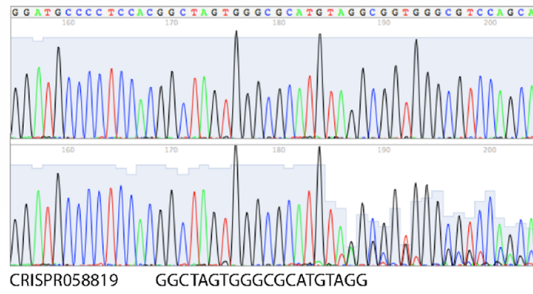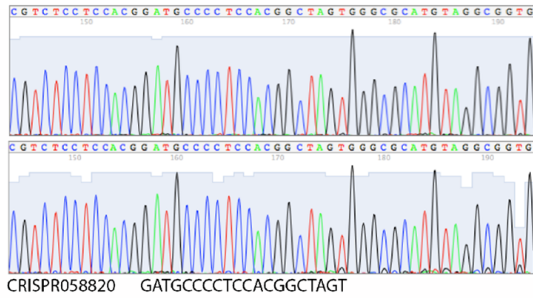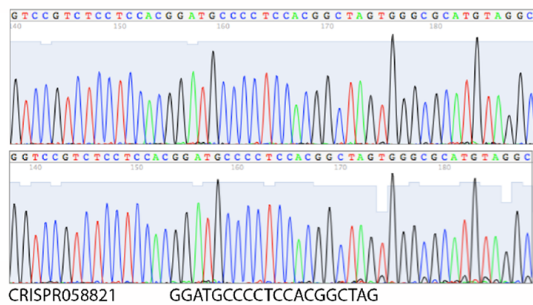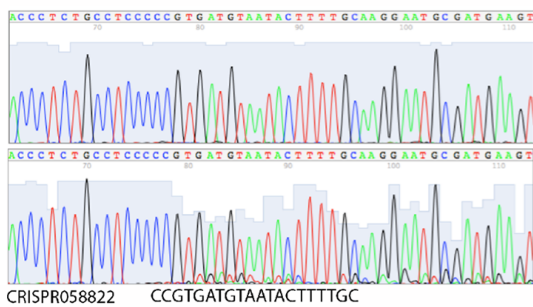

**C**

MCF7

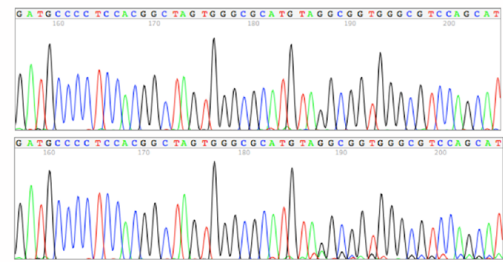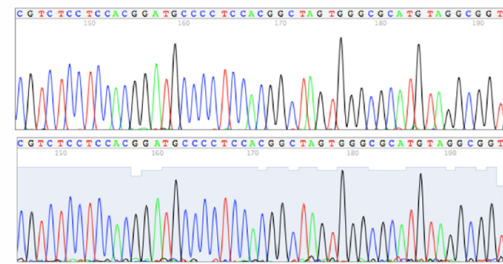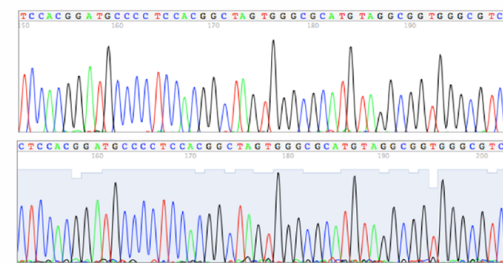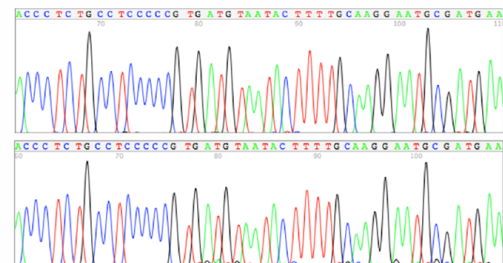

## A ESR1 Exon 8 WT

```

AAC AAA GGC ATG GAG CAT CTG TAC AGC ATG AAG TGC AAG AAC GTG GTG CCC CTC TAT GAC CTG CTG CTG GAG ATG CTG GAC
N K G M E H L Y S M K C K N V V P L Y D L L L L E M L D

GCC CAC CGC CTA CAT GCG CCC ACT AGC CGT GGA GGG GCA TCC GTG GAG GAG ACG GAC CAA AGC CAC TTG GCC ACT GCG GGC
A H R L H A P T S R G G A S V E E T D Q S H L A T A G

TCT ACT TCA TCG CAT TCC TTG CAA AAG TAT TAC ATC ACG GGG GAG GCA GAG GGT TTC CCT GCC ACG GTC TGA
S T S S H S L Q K Y Y I T G E A E G F P A T V *
  
```

## B ESR1 Exon 8 - Y537S

```

AAC AAA GGC ATG GAG CAT CTG TAC AGC ATG AAG TGC AAG AAC GTG GTG CCC CTg TcT GAC CTG CTG CTG GAG ATG CTG GAC
N K G M E H L Y S M K C K N V V P L S D L L L L E M L D

GCC CAt aGa CTt CAc GCG CCC ACT AGC CGT GGA GGG GCA TCC GTG GAG GAG ACG GAC CAA AGC CAC TTG GCC ACT GCG GGC
A H R L H A P T S R G G A S V E E T D Q S H L A T A G

TCT ACT TCA TCG CAT TCC TTG CAA AAG TAT TAC ATC ACG GGG GAG GCA GAG GGT TTC CCT GCC ACG GTC TGA
S T S S H S L Q K Y Y I T G E A E G F P A T V *
  
```

## C MCF7-Y537S

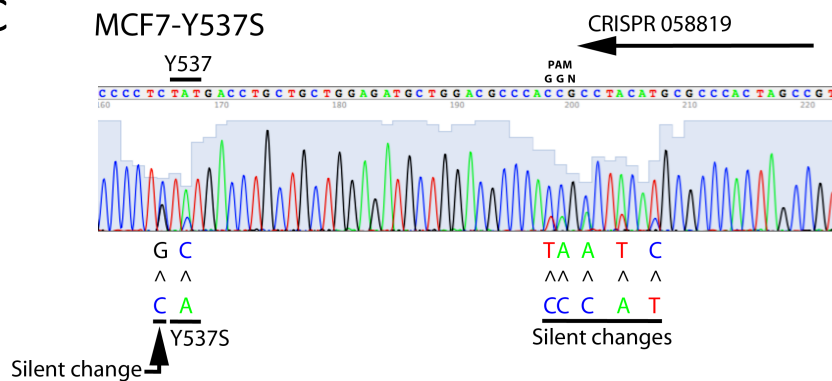

## D

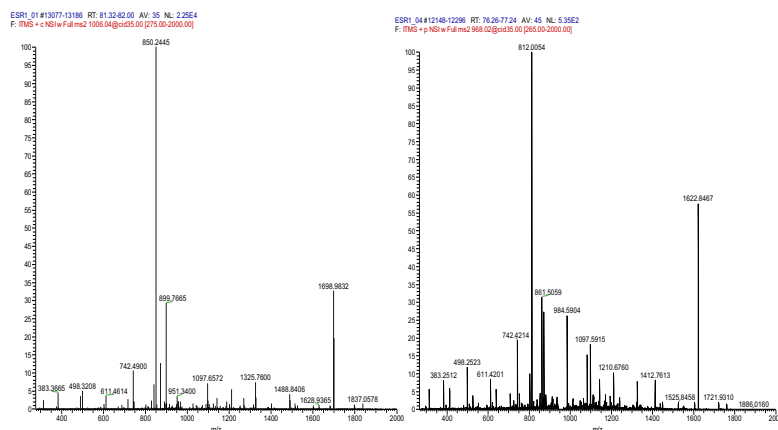

|                    | <b>Cell Line</b> | <b>Aligned Reads</b> | <b>% Aligned</b> |
|--------------------|------------------|----------------------|------------------|
| <b>Input</b>       | MCF7             | 39,546,235           | 97.1             |
|                    | Y537S            | 29,153,768           | 97.3             |
| <b>ER ChIP-seq</b> | MCF7 Vehicle     | 20,088,536           | 96.5             |
|                    | MCF7 Estrogen    | 22,891,010           | 96.5             |
|                    | Y537S Vehicle    | 22,794,741           | 96.6             |
|                    | Y537S Estrogen   | 30,810,824           | 97.3             |

**Supplementary Figure 3.**

A

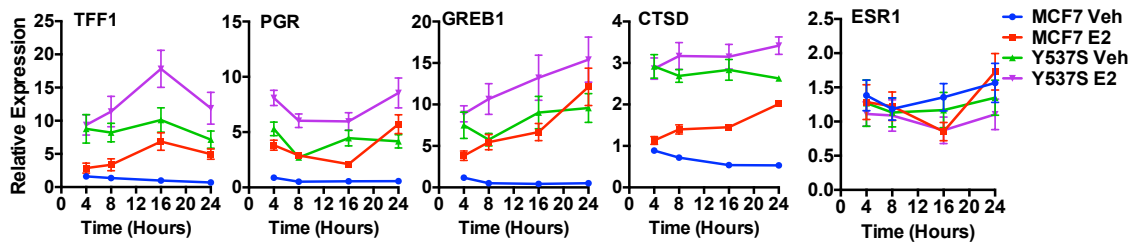

B

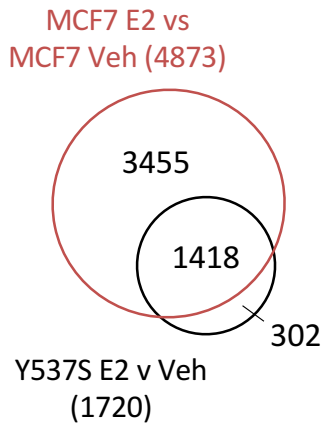

C

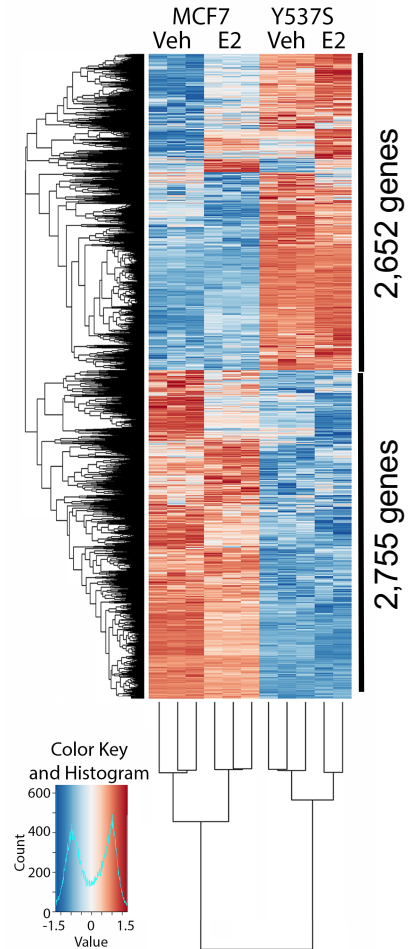

Supplementary Figure 4.

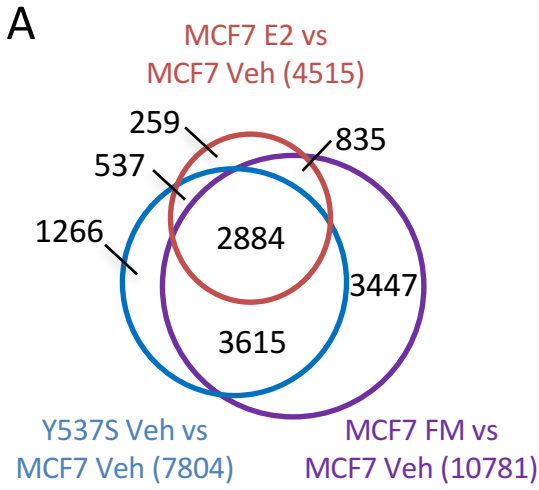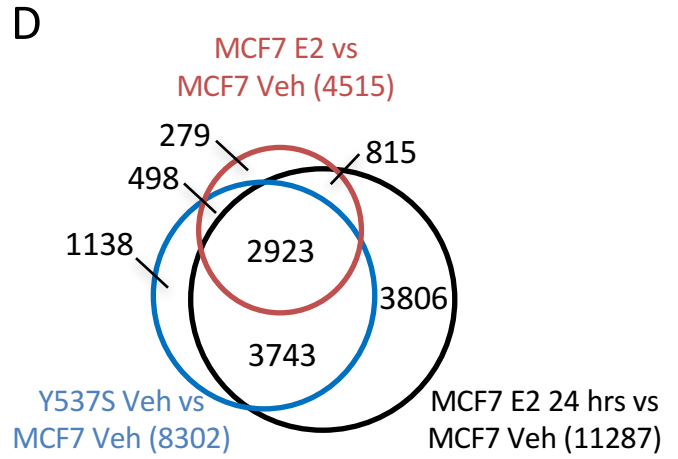

**B**

GSEA Analysis for Genes common to all MCF7 E2vsVeh, MCF7 Full medium v MCF7 Veh and Y537S veh vs MCF7 Veh

| Pathway                                    | # Genes in Gene Set (K) | # Genes in Overlap (k) | k/K   | p-value  | FDR q-value |
|--------------------------------------------|-------------------------|------------------------|-------|----------|-------------|
| HALLMARK_ESTROGEN_RESPONSE_EARLY           | 200                     | 110                    | 0.55  | 1.39E-79 | 6.96E-78    |
| HALLMARK_E2F_TARGETS                       | 200                     | 109                    | 0.545 | 2.73E-78 | 6.82E-77    |
| HALLMARK_ESTROGEN_RESPONSE_LATE            | 200                     | 98                     | 0.49  | 1.16E-64 | 1.93E-63    |
| HALLMARK_G2M_CHECKPOINT                    | 200                     | 89                     | 0.445 | 2.64E-54 | 2.20E-53    |
| HALLMARK_MITOTIC_SPINDLE                   | 200                     | 89                     | 0.445 | 2.64E-54 | 2.20E-53    |
| HALLMARK_TNFA_SIGNALING_VIA_NFKB           | 200                     | 89                     | 0.445 | 2.64E-54 | 2.20E-53    |
| HALLMARK_MYC_TARGETS_V1                    | 200                     | 83                     | 0.415 | 8.45E-48 | 6.04E-47    |
| HALLMARK_MTORC1_SIGNALING                  | 200                     | 76                     | 0.38  | 1.27E-40 | 7.05E-40    |
| HALLMARK_PS3_PATHWAY                       | 200                     | 76                     | 0.38  | 1.27E-40 | 7.05E-40    |
| HALLMARK_EPITHELIAL_MESENCHYMAL_TRANSITION | 200                     | 71                     | 0.355 | 8.94E-36 | 4.47E-35    |

**C**

GSEA Analysis for Genes for Y537S vehicle vs MCF7 vehicle compared with MCF7 Full medium vs MCF7 vehicle

| Pathway                            | # Genes in Gene Set (K) | # Genes in Overlap (k) | k/K    | p-value  | FDR q-value |
|------------------------------------|-------------------------|------------------------|--------|----------|-------------|
| HALLMARK_FATTY_ACID_METABOLISM     | 158                     | 49                     | 0.3101 | 3.30E-22 | 1.65E-20    |
| HALLMARK_UV_RESPONSE_DN            | 144                     | 43                     | 0.2986 | 5.71E-19 | 1.12E-17    |
| HALLMARK_OXIDATIVE_PHOSPHORYLATION | 200                     | 51                     | 0.255  | 6.69E-19 | 1.12E-17    |
| HALLMARK_INTERFERON_GAMMA_RESPONSE | 200                     | 49                     | 0.245  | 1.91E-17 | 2.39E-16    |
| HALLMARK_ADIPOGENESIS              | 200                     | 47                     | 0.235  | 4.92E-16 | 4.92E-15    |
| HALLMARK_G2M_CHECKPOINT            | 200                     | 46                     | 0.23   | 2.39E-15 | 1.49E-14    |
| HALLMARK_MITOTIC_SPINDLE           | 200                     | 46                     | 0.23   | 2.39E-15 | 1.49E-14    |
| HALLMARK_PS3_PATHWAY               | 200                     | 46                     | 0.23   | 2.39E-15 | 1.49E-14    |
| HALLMARK_GLYCOLYSIS                | 200                     | 45                     | 0.225  | 1.13E-14 | 6.28E-14    |
| HALLMARK_PEROXISOME                | 104                     | 31                     | 0.2981 | 4.60E-14 | 2.30E-13    |

**E**

GSEA Analysis for Genes common to all MCF7 E2vsVeh, MCF7 E2 24 hrs v MCF7 Veh and Y537S veh vs MCF7 V

| Pathway                                    | # Genes in Gene Set (K) | # Genes in Overlap (k) | k/K   | p-value  |
|--------------------------------------------|-------------------------|------------------------|-------|----------|
| HALLMARK_E2F_TARGETS                       | 200                     | 75                     | 0.375 | 3.77E-62 |
| HALLMARK_ESTROGEN_RESPONSE_EARLY           | 200                     | 66                     | 0.33  | 1.35E-50 |
| HALLMARK_ESTROGEN_RESPONSE_LATE            | 200                     | 66                     | 0.33  | 1.35E-50 |
| HALLMARK_G2M_CHECKPOINT                    | 200                     | 59                     | 0.295 | 3.58E-42 |
| HALLMARK_TNFA_SIGNALING_VIA_NFKB           | 200                     | 55                     | 0.275 | 1.36E-37 |
| HALLMARK_MYC_TARGETS_V1                    | 200                     | 48                     | 0.24  | 5.20E-30 |
| HALLMARK_EPITHELIAL_MESENCHYMAL_TRANSITION | 200                     | 47                     | 0.235 | 5.64E-29 |
| HALLMARK_HYPOXIA                           | 200                     | 47                     | 0.235 | 5.64E-29 |
| HALLMARK_MITOTIC_SPINDLE                   | 200                     | 43                     | 0.215 | 5.90E-25 |
| HALLMARK_PS3_PATHWAY                       | 200                     | 43                     | 0.215 | 5.90E-25 |

**F**

GSEA Analysis for Genes common to all MCF7 E2 24 hrs v MCF7 Veh and Y537S veh vs MCF7 Veh

| Pathway                                    | # Genes in Gene Set (K) | # Genes in Overlap (k) | k/K    | p-value  |
|--------------------------------------------|-------------------------|------------------------|--------|----------|
| HALLMARK_MITOTIC_SPINDLE                   | 200                     | 74                     | 0.37   | 2.40E-37 |
| HALLMARK_E2F_TARGETS                       | 200                     | 73                     | 0.365  | 2.13E-36 |
| HALLMARK_G2M_CHECKPOINT                    | 200                     | 70                     | 0.35   | 1.31E-33 |
| HALLMARK_GLYCOLYSIS                        | 200                     | 57                     | 0.285  | 1.49E-22 |
| HALLMARK_FATTY_ACID_METABOLISM             | 158                     | 48                     | 0.3038 | 1.63E-20 |
| HALLMARK_EPITHELIAL_MESENCHYMAL_TRANSITION | 200                     | 52                     | 0.26   | 9.05E-19 |
| HALLMARK_MYOGENESIS                        | 200                     | 52                     | 0.26   | 9.05E-19 |
| HALLMARK_MTORC1_SIGNALING                  | 200                     | 51                     | 0.255  | 4.79E-18 |
| HALLMARK_APOPTOSIS                         | 161                     | 44                     | 0.2733 | 5.43E-17 |
| HALLMARK_PI3K_AKT_MTOR_SIGNALING           | 105                     | 35                     | 0.3333 | 9.01E-17 |

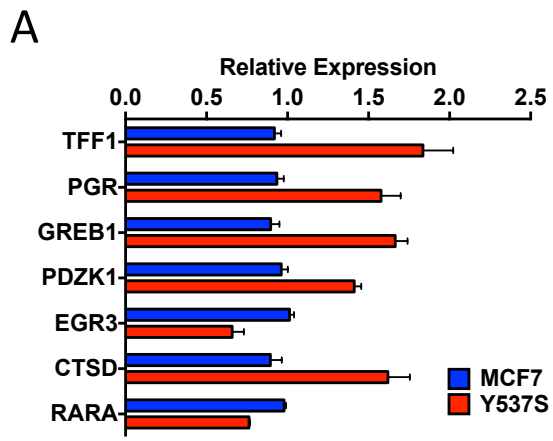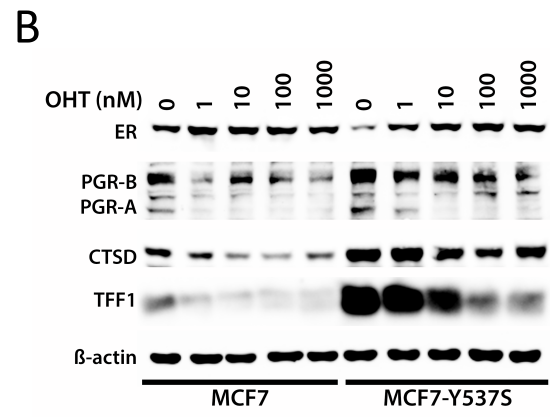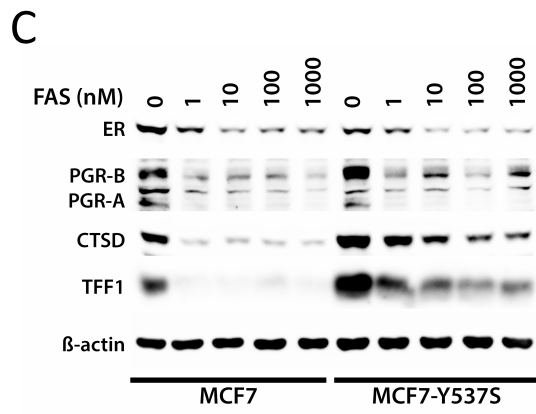

Supplement: NIHMS69792-supplement-Supplementary_Figures.pdf [file NIHMS69792-supplement-Supplementary_Figures.pdf]
