# Supplementary material for: Genomic modelling of the ESR1 Y537S mutation for evaluating function and new therapeutic approaches for metastatic breast cancer
Source: PubMed Central journal article supplement (PMC5245767; doi:10.1038/onc.2016.382), 2016-10-17
Supplement: NIHMS69792-supplement-Supplementary_Table_1.pdf [file NIHMS69792-supplement-Supplementary_Table_1.pdf]

**Antibodies for ChIP**

| <b>Protein</b>                   | <b>Catalogue Number</b> | <b>Supplier</b> |
|----------------------------------|-------------------------|-----------------|
| <b>ESR1</b>                      | sc-543                  | Santa Cruz      |
| <b>GATA3</b>                     | sc-268                  | Santa Cruz      |
| <b>p300</b>                      | sc-585                  | Santa Cruz      |
| <b>RNA polymerase II (PolII)</b> | 05-623                  | Millipore       |
| <b>Ac-H3</b>                     | 06-599                  | Millipore       |
| <b>AIB1</b>                      | 611105                  | BD Biosciences  |
| <b>FOXA1</b>                     | ab5089, ab23738         | Abcam           |
| <b>Normal Rabbit IgG</b>         | #2729                   | Cell Signalling |

**Antibodies for Immunoblotting**

| <b>Protein</b>  | <b>Dilution</b>    | <b>Cat. No.</b>    | <b>Supplier</b>        |
|-----------------|--------------------|--------------------|------------------------|
| <b>ER</b>       | <b>1 : 1,000</b>   | <b>NCL-ER-6F11</b> | <b>Novacastra</b>      |
| <b>P-Ser118</b> | <b>1:500</b>       | <b>2511</b>        | <b>Cell Signalling</b> |
| <b>P-Ser167</b> | <b>1:500</b>       | <b>5587</b>        | <b>Cell Signaling</b>  |
| <b>FOXA1</b>    | <b>1:1000</b>      | <b>ab23738</b>     | <b>Abcam</b>           |
| <b>GATA3</b>    | <b>1:500</b>       | <b>sc-268x</b>     | <b>Santa Cruz</b>      |
| <b>PGR</b>      | <b>1:200</b>       | <b>sc-538</b>      | <b>Santa Cruz</b>      |
| <b>CTSD</b>     | <b>1: 2,000</b>    | <b>ab6313</b>      | <b>Abcam</b>           |
| <b>MYC</b>      | <b>1 : 1,000</b>   | <b>ab32</b>        | <b>Abcam</b>           |
| <b>TFF1</b>     | <b>1:200</b>       | <b>sc-28925</b>    | <b>Santa Cruz</b>      |
| <b>PDZK1</b>    | <b>1:300</b>       | <b>10507-2-AP</b>  | <b>Proteintech</b>     |
| <b>RARA</b>     | <b>1 : 1,000</b>   | <b>Ab39971</b>     | <b>Abcam</b>           |
| <b>CCND1</b>    | <b>1:200</b>       | <b>Ab16663</b>     | <b>Abcam</b>           |
| <b>β-actin</b>  | <b>1 : 100,000</b> | <b>Ab6276</b>      | <b>Abcam</b>           |
| <b>PolII</b>    | <b>1:500</b>       | <b>Ab5408</b>      | <b>Abcam</b>           |

|                        |                  |                   |                       |
|------------------------|------------------|-------------------|-----------------------|
| <b>PolII P-Ser2</b>    | <b>1:500</b>     | <b>Ab5095</b>     | <b>Abcam</b>          |
| <b>PolII P-Ser5</b>    | <b>1:500</b>     | <b>Ab5131</b>     | <b>Abcam</b>          |
| <b>PolII P-Ser7</b>    | <b>1:500</b>     | <b>Ab126538</b>   | <b>Abcam</b>          |
| <b>RB</b>              | <b>1:500</b>     | <b>sc-50</b>      | <b>Santa Cruz</b>     |
| <b>RB P-Ser780</b>     | <b>1:500</b>     | <b>9307</b>       | <b>Cell Signaling</b> |
| <b>RB P-Ser795</b>     | <b>1:500</b>     | <b>9301</b>       | <b>Cell Signaling</b> |
| <b>RB P-Ser807/811</b> | <b>1:500</b>     | <b>9308</b>       | <b>Cell Signaling</b> |
| <b>RB P-Thr821</b>     | <b>1:500</b>     | <b>Ab4787</b>     | <b>Abcam</b>          |
| <b>XPD</b>             | <b>1:500</b>     | <b>Ab111596</b>   | <b>Abcam</b>          |
| <b>CDK7</b>            | <b>1 : 1,000</b> | <b>Ab9516-500</b> | <b>Abcam</b>          |
| <b>LAMIN A/C</b>       | <b>1:500</b>     | <b>sc-7292</b>    | <b>Santa Cruz</b>     |

#### **RT-qPCR Assays**

| <b>Gene Name</b>          | <b>Taqman Assay Cat. No.</b> |
|---------------------------|------------------------------|
| <b>ESR1</b>               | Hs00174860_m1                |
| <b>TFF1</b>               | Hs00170216_m1                |
| <b>GREB1</b>              | Hs00536409_m1                |
| <b>PGR</b>                | Hs00172183_m1                |
| <b>Cathepsin D (CTSD)</b> | Hs00157201_m1                |
| <b>EGR3</b>               | Hs00231780_m1                |
| <b>PDZK1</b>              | Hs00275727_m1                |
| <b>MYC</b>                | Hs00153408_m1                |
| <b>RARA</b>               | Hs00940446_m1                |
| <b>GAPDH</b>              | Hs99999905_m1                |

## ChIP-qPCR Primers

|                                    |                                                               |
|------------------------------------|---------------------------------------------------------------|
| <b>TFF1 Promoter Proximal ERE:</b> | 5'-TATGAATCACTTCTGCAGTGAG-3'<br>5'-GAGCGTTAGATAACATTTGCC-3'   |
| <b>TFF1 Control [Control 1]:</b>   | 5'-GTGATTCTCCTGACTTAACC-3'<br>5'-TGGCGCAGTGGCTCACGCTG-3'      |
| <b>GREB1</b>                       | 5'-GGGTGAAATGAAGTGGCATGTG-3'<br>5'-GAACAAAACAGAGCAAGGCCAAA-3' |
| <b>PGR 3':</b>                     | 5'-TGCCTCTCCCATGTCTCCAT-3'<br>5'-TCCCAGAATGTCAGCCTCAT-3'      |
| <b>PGR Control [Control 2]:</b>    | 5'-CCACCACATTTTGTCTCTGC-3'<br>5'-GGGAGGGAGGAATGGAAGTGC-3'     |
| <b>PDZK1:</b>                      | 5'-AGGCCAGCAAAGACAAATG-3'<br>5'-AAACCACAGGCTGAGGACTG-3'       |
| <b>MYC:</b>                        | 5'-AGGGTGAGGTCAAGCATTTG-3'<br>5'-TGGCCTTGAACCCATACTTC-3'      |
| <b>XBP1:</b>                       | 5'-ATCAGGGCAGCCTTCAAGAC-3'<br>5'-CAGGGGAACAAAAGCAGCAC-3'      |
